# Supplementary material
Source: publisher site journal article supplement (https://www.spandidos-publications.com/7270/downloadSupplementary)
Supplement: Supplementary file 1 [file downloadSupplementary]

Table SI. Sequences of miRNAs used in the present study.

| Assay name  | miRNA sequence (5'-3') |
|-------------|------------------------|
| hsa-miR-21  | UAGCUUAUCAGACUGAUGUUGA |
| hsa-miR-221 | CUCAGUAGCCAGUGUAGAUCU  |

miRNA or miR, microRNA.
